# Supplementary material for: Synthesis and spectral characterization of 4-methylthiazole derivatives: DFT approach and biological activities
Source: Royal Society of Chemistry journal article supplement (doi:10.1039/d3nj03046f), 2023-01-01
Supplement: d3nj03046f1.pdf [file d3nj03046f1.pdf]

## **Supportive Data**

### **A synthesis and spectral characterization of 4-methylthiazole derivatives: DFT approach and biological activities**

**Pakkirisamy Sivakumar<sup>1</sup>, Sarangapani Bharanidharan<sup>2</sup>, Rajaram Rajamohan<sup>3\*</sup>,  
Balasubramaniyan Anandhan<sup>4</sup>, Thangavelu Sumathi<sup>4</sup>, Subramaniyan Kamatchi<sup>4\*</sup>**

<sup>1</sup> Department of Chemistry, Saraswathy College of Engineering and Technology, Olakkur,  
Tindivanam- 604 305, Tamil Nadu, India.

<sup>2</sup> Department of Physics, Panimalar Engineering College, Chennai - 600 123, Tamil Nadu,  
India.

<sup>3\*</sup> Organic Materials Synthesis Lab, School of Chemical Engineering, Yeungnam University,  
Gyeongsan 38541, Republic of Korea.

<sup>4\*</sup> PG & Research Department of Chemistry, Government Arts College, Chidambaram - 608  
102, Tamil Nadu, India.

**Correspondance : [rajmohanau@yu.ac.kr](mailto:rajmohanau@yu.ac.kr), [drskgacdmchem@gmail.com](mailto:drskgacdmchem@gmail.com)**

### **Anti-inflammation activity (albumin denaturation method)**

To evaluate the anti-inflammatory activity of the synthesized molecules and standard diclofenac sodium, a modified albumin denaturation inhibition method was employed. The standard drug and MTs were diluted with phosphate buffer and dissolved in a small amount of DMF, with DMF present at a final concentration of less than 2.5% in all solutions. In the test solution (2.5 mL), different amounts of the drug were combined with 1 mL of a 1 mM Bovine Serum Albumin (BSA) solution in phosphate buffer. The mixture was then incubated at 37.0 °C for 10 minutes. Denaturation was induced by placing the reaction mixture in a water bath maintained at 70.0 °C for 10 minutes. The resulting turbidity was measured at 660.0 nm after cooling. The percentage of denaturation inhibition was determined by comparing it to the control, which did not have any drug added. The percentage inhibition of denaturation was calculated using the provided method.

$$\% \text{ of Inhibition} = 100 \times [A_c - A_t / A_c]$$

$A_t$ : Absorbance of test

$A_c$ : Absorbance of control

### **Anti-diabetic activity ( $\alpha$ -amylase inhibition method)**

The anti-diabetic activity of the synthesized molecules, MTs, was evaluated using the  $\alpha$ -amylase inhibition technique. A solution of  $\alpha$ -amylase (0.2%) was treated with samples (in 1.5 mL), standard drug acarbose, or without any treatment for 10 minutes at 25.0 °C. This assessment was performed in a 0.2M phosphate buffer solution with a pH of 6.9. After the pre-incubation, a 1% starch solution (0.5 mL) was added, and the reaction mixture was incubated for 30 minutes at 25.0 °C. To stop the enzymatic reaction, a coloring reagent called DNSA reagent (0.5 mL) was added, and the mixture was incubated for approximately 90 minutes in a boiling water bath. The absorbance of the samples was measured at 540.0 nm using a UV-Visible spectrophotometer. Prior to measurement, the samples were diluted with 2.5 mL of distilled water and allowed to settle to room temperature. The absorbance of the samples was compared to the absorbance of the control experiment. By applying the provided formula, the percentage of inhibition was calculated based on the absorbance values obtained.

$$\% \text{ of Inhibition} = 100 \times [A_c - A_t / A_c]$$

$A_t$ : Absorbance of test

$A_c$ : Absorbance of control

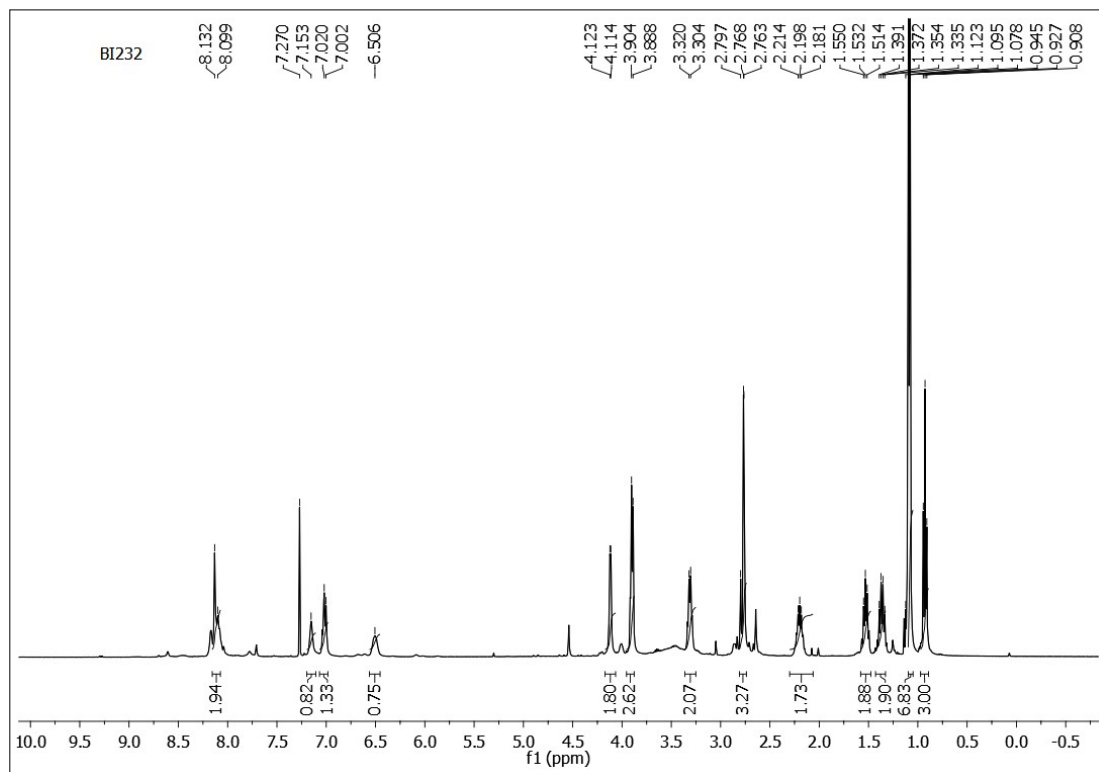

Figure S1.  $^1\text{H}$  NMR spectrum of compound 6

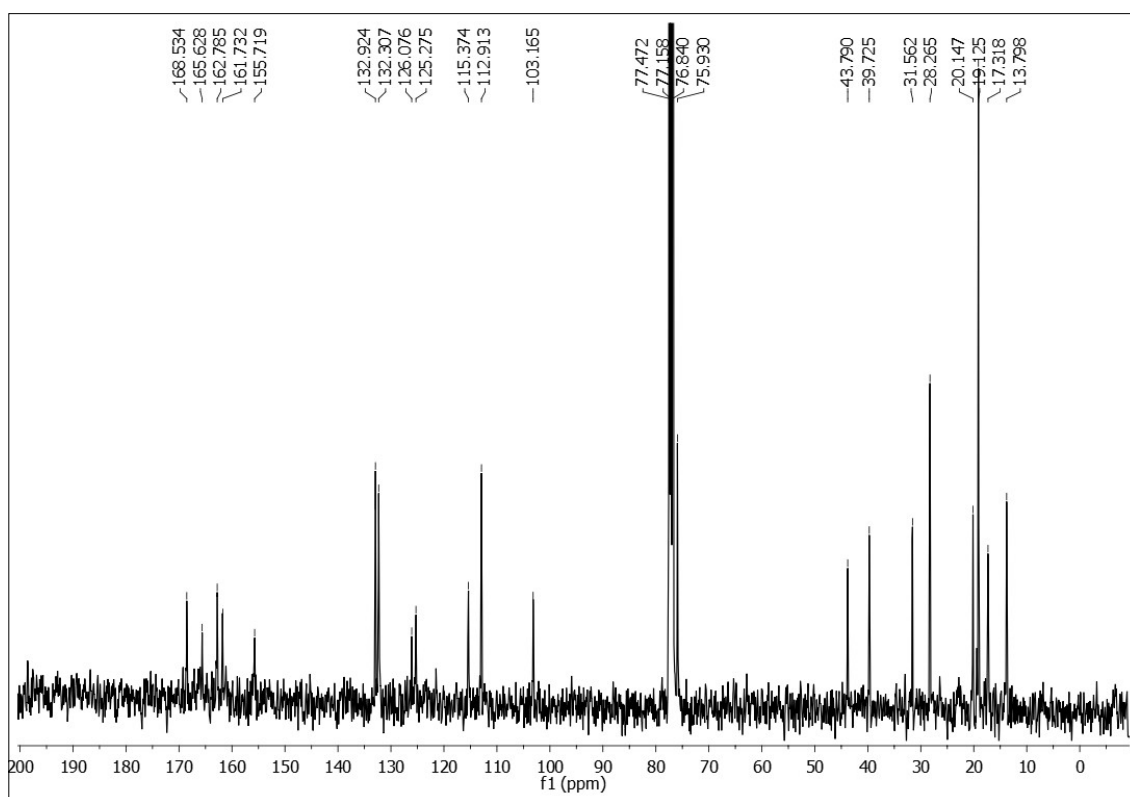

Figure S2.  $^{13}\text{C}$  NMR spectrum of compound 6

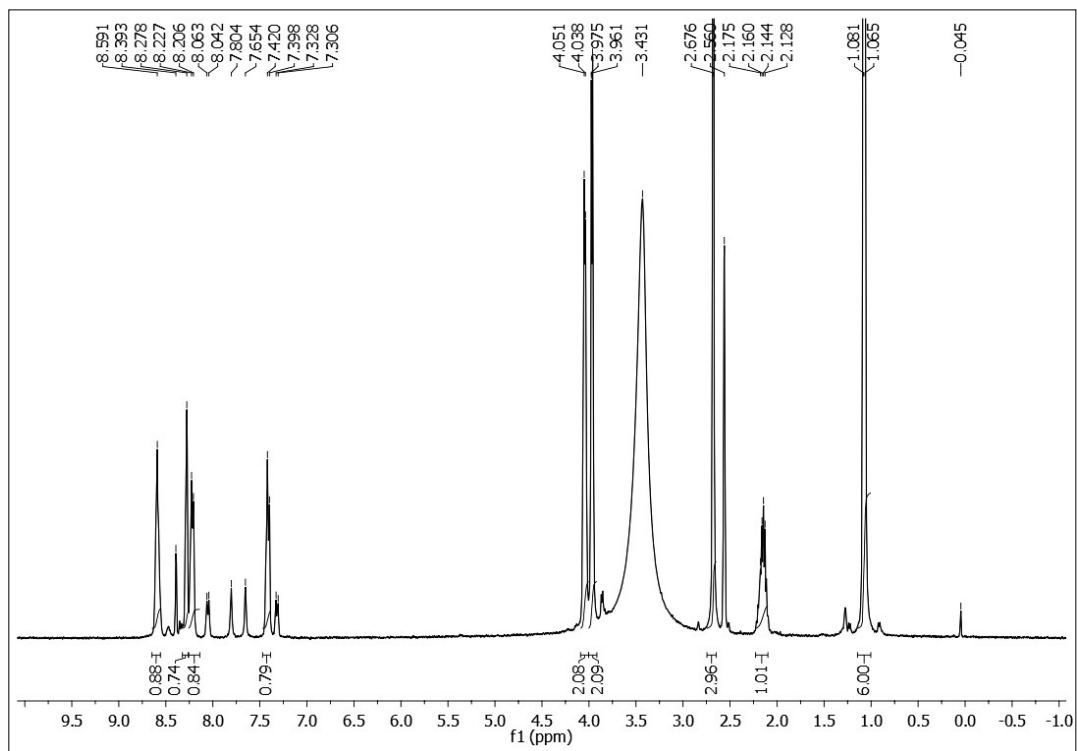

Figure S3.  $^1\text{H}$  NMR spectrum of compound 7

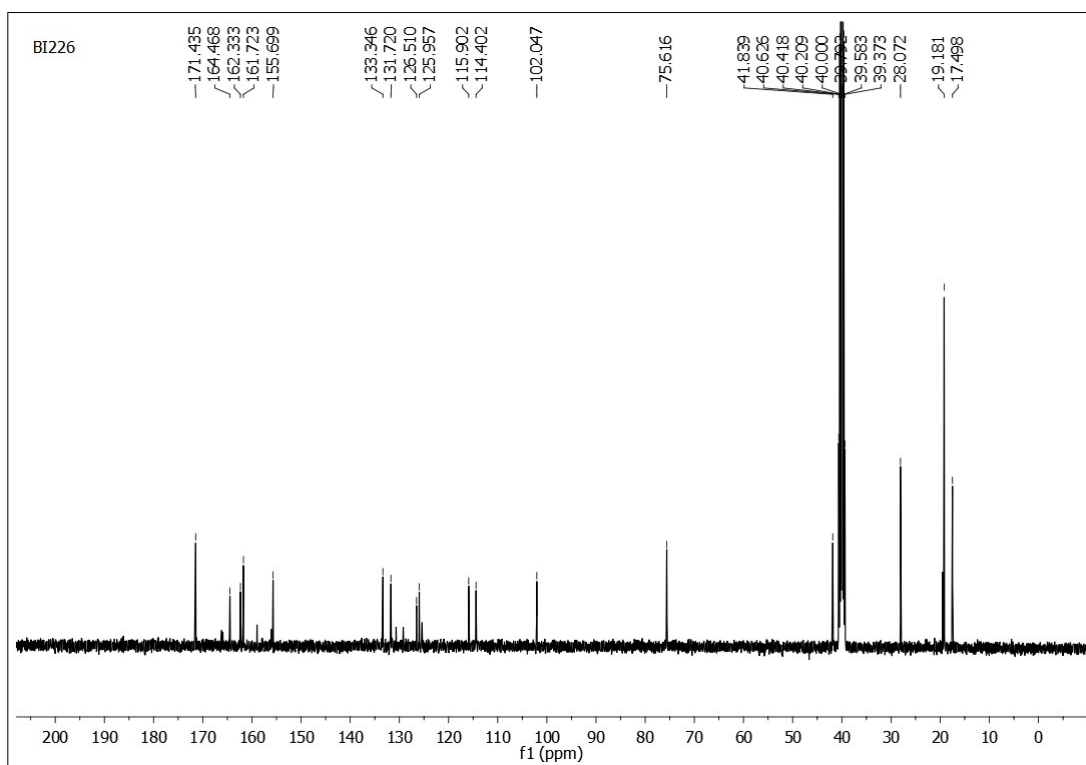

Figure S4.  $^{13}\text{C}$  NMR spectrum of compound 7

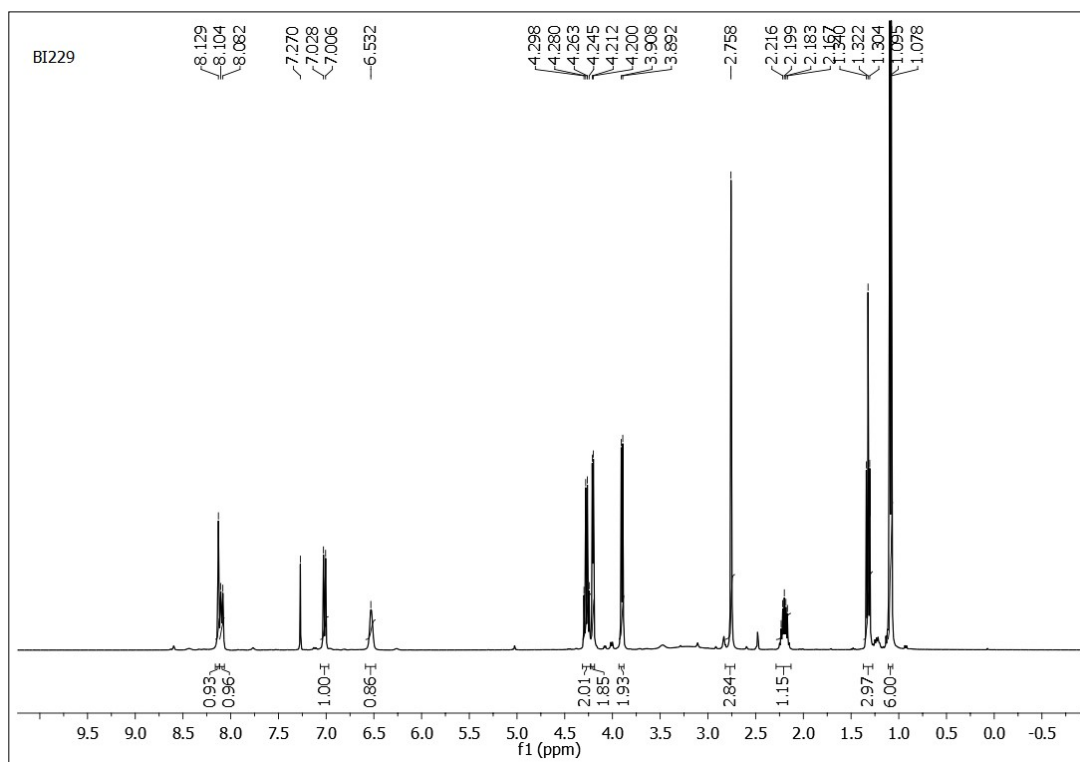

Figure S5.  $^1\text{H}$  NMR spectrum of compound **9**

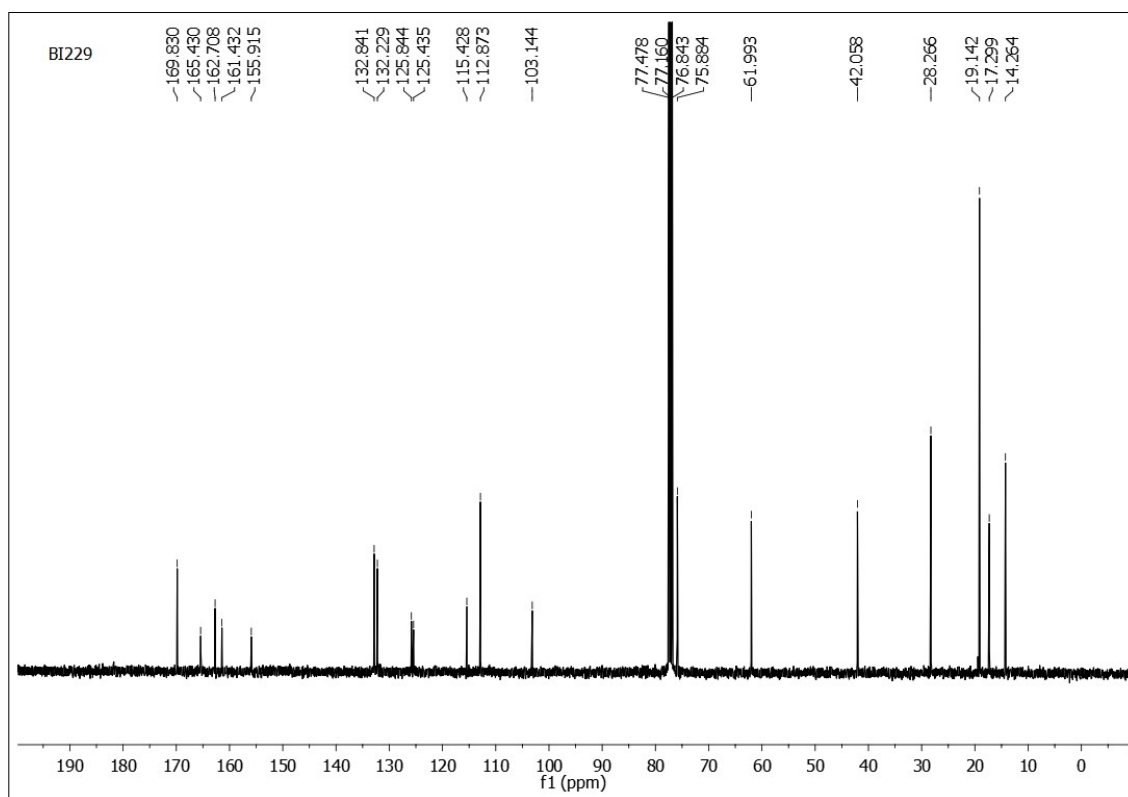

Figure S6.  $^{13}\text{C}$  NMR spectrum of compound **9**

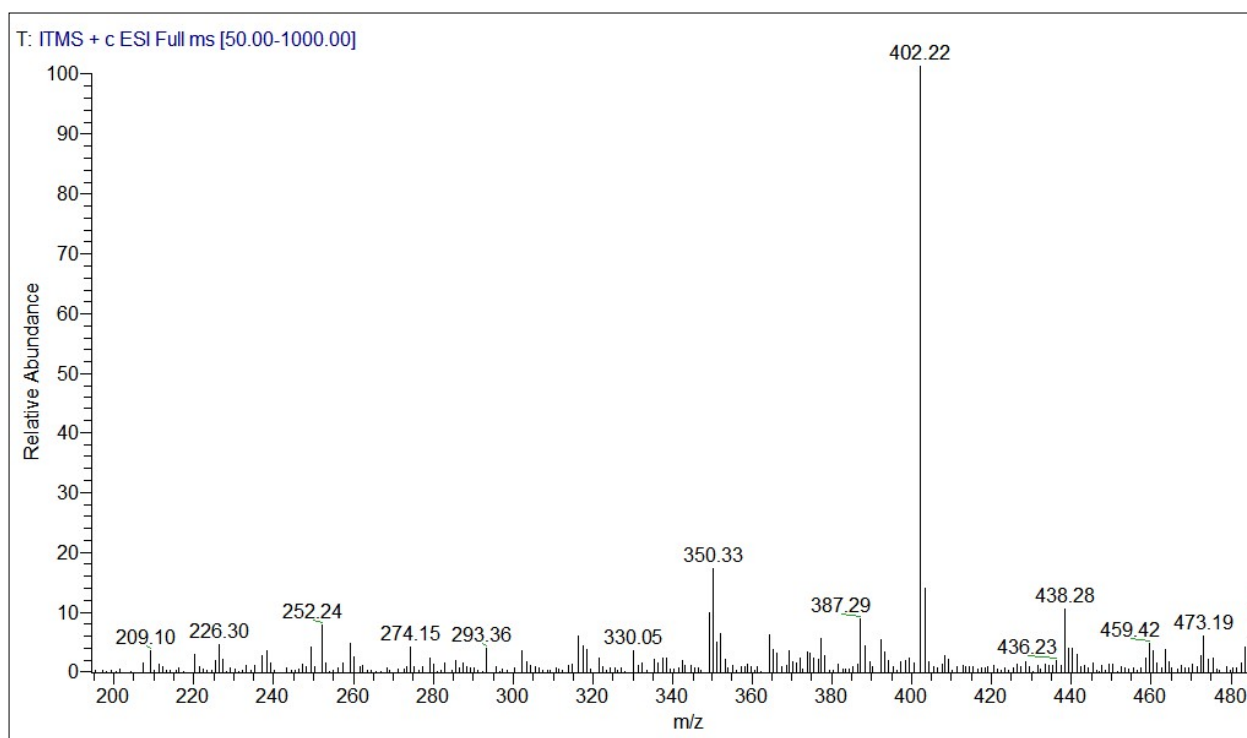

**Figure S7.** ESI-Mass spectrum of compound **6**

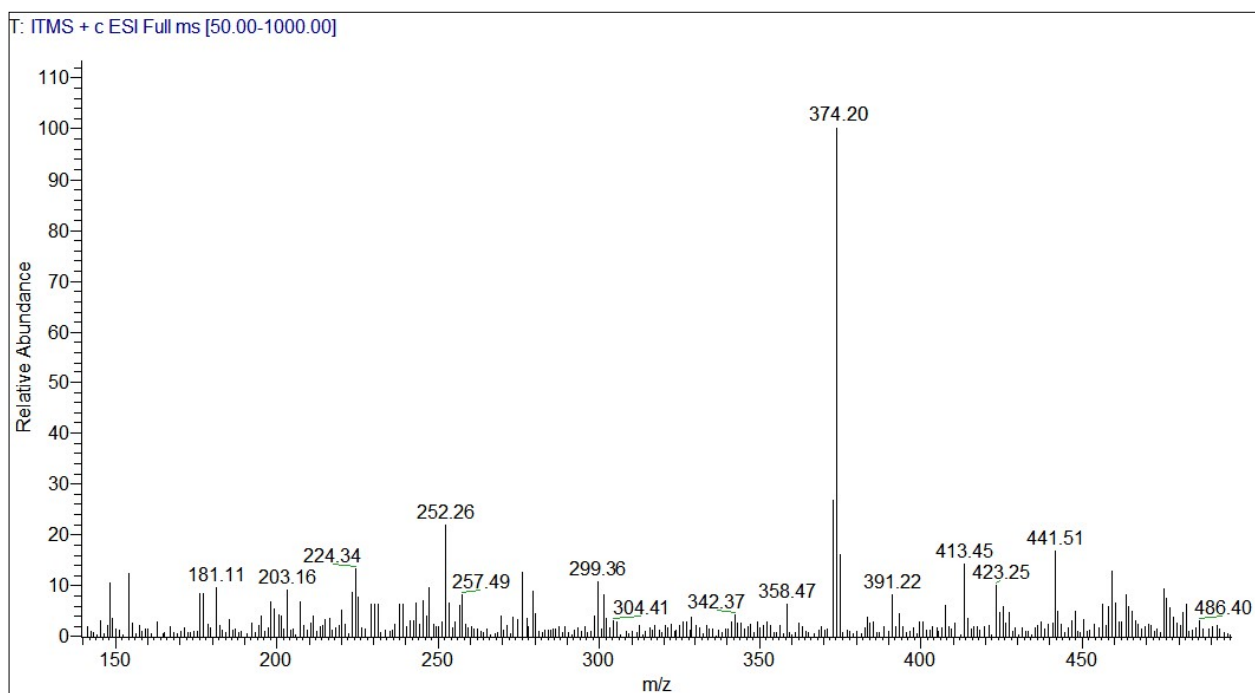

**Figure S8.** ESI-Mass spectrum of compound 7



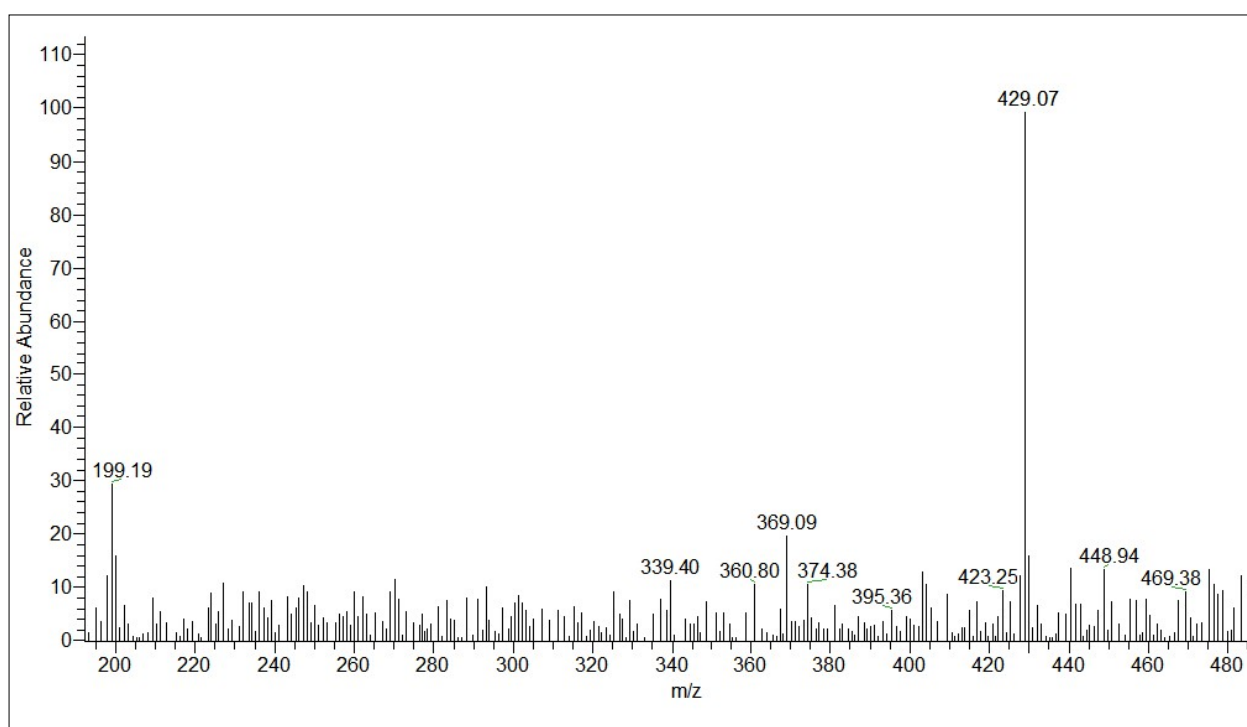

**Figure S9.** ESI-Mass spectrum of compound **9**

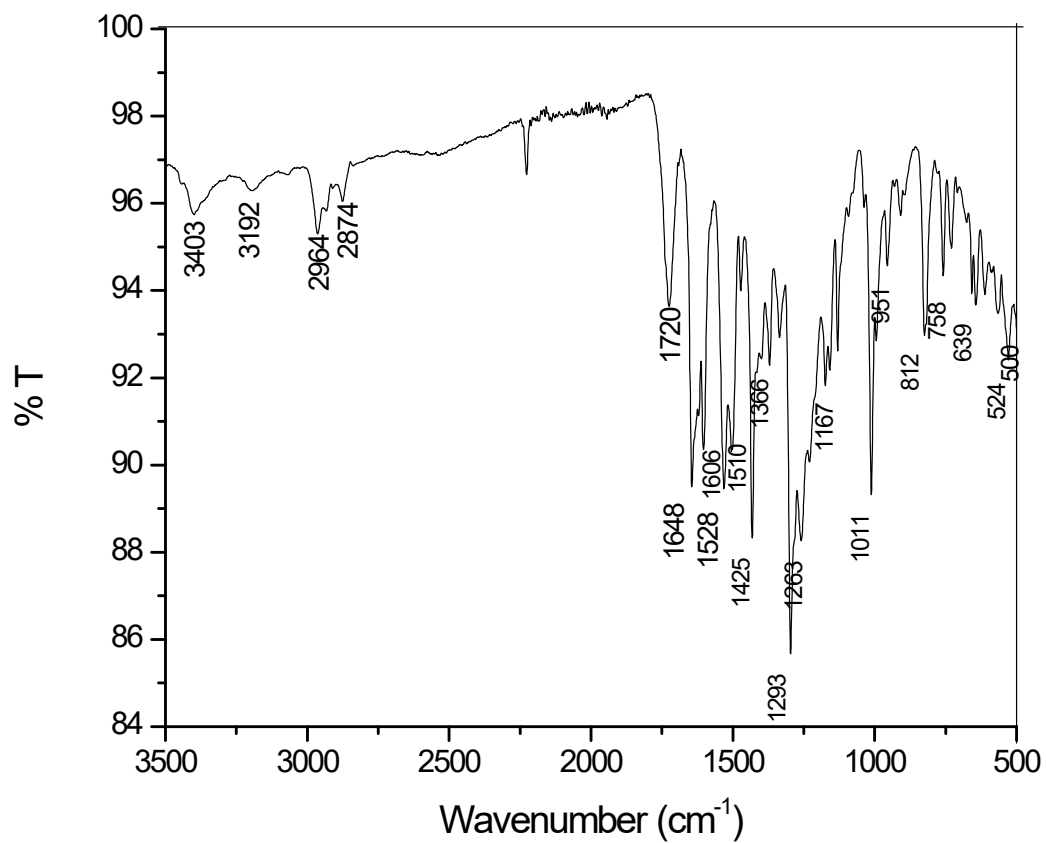

**Figure S10.** FT-IR spectrum of compound **6**

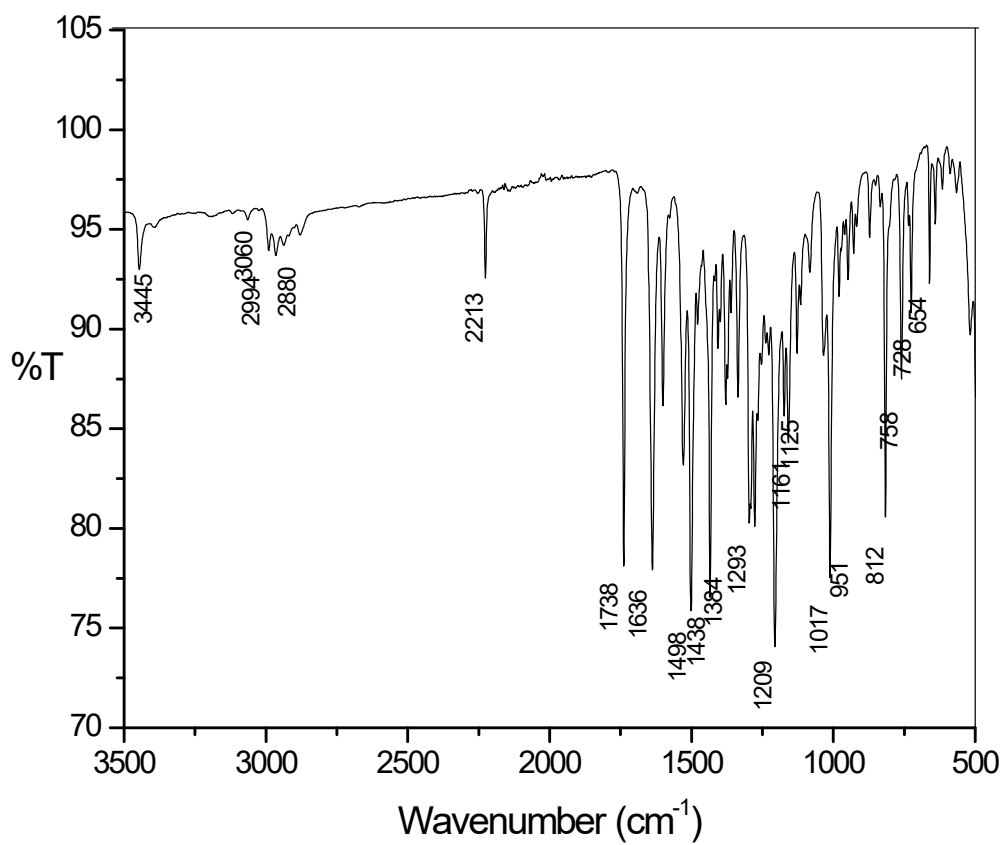

**Figure S11.** FT-IR spectrum of compound 7

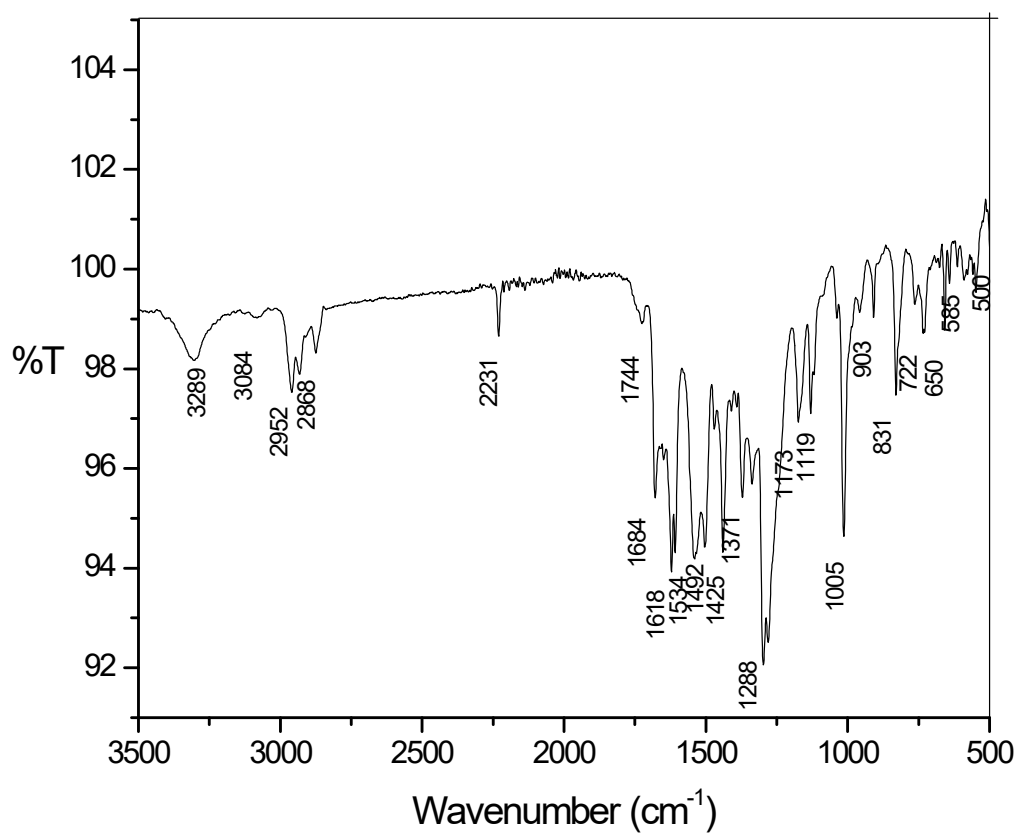

**Figure S12.** FT-IR spectra of compound 9.

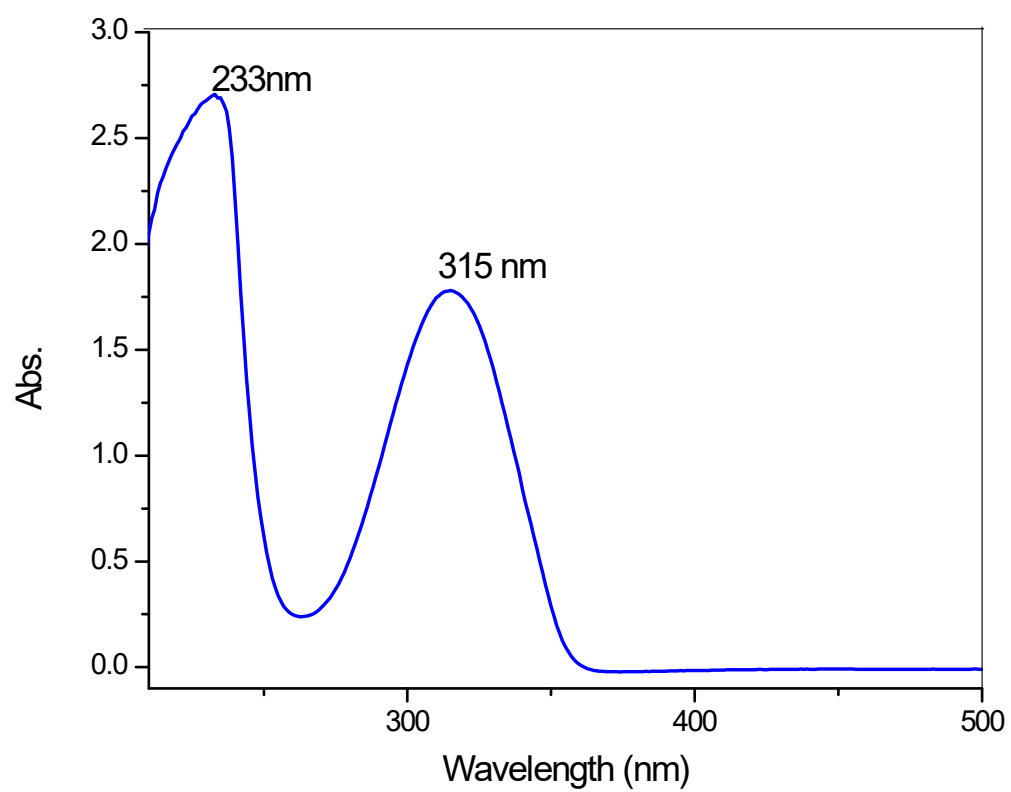

**Figure S13.** The UV-Visible spectrum of compound **6**

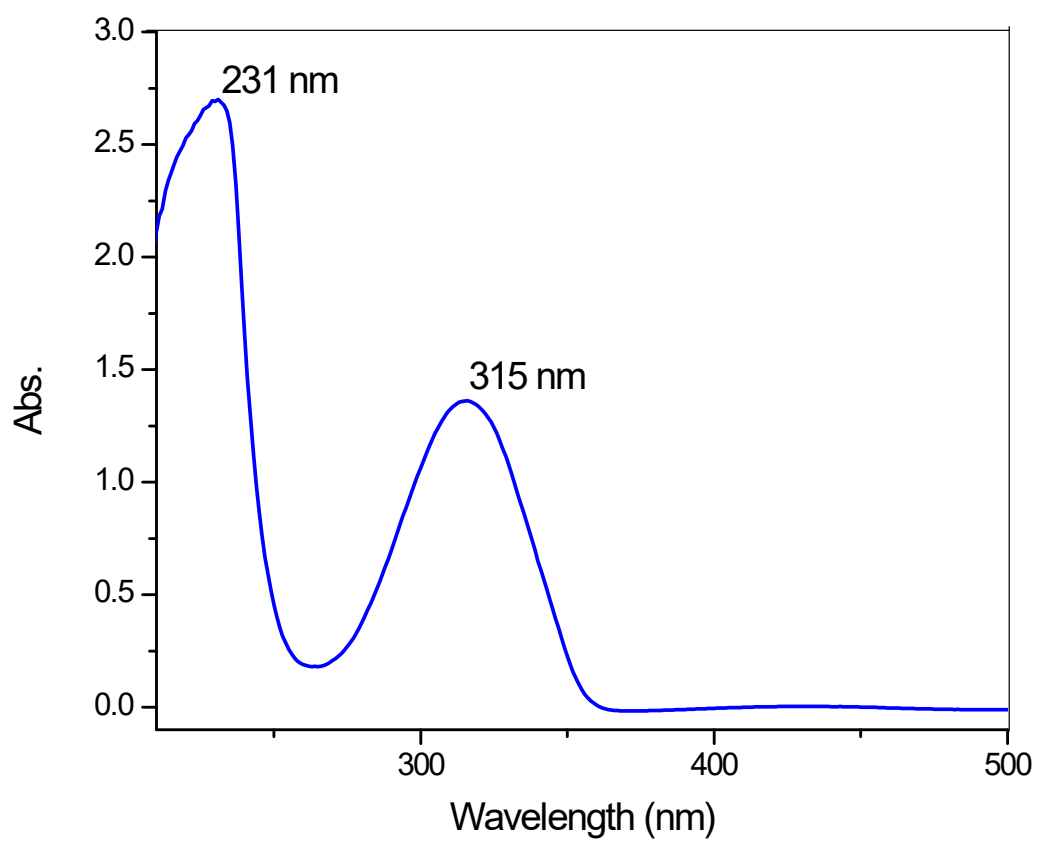

**Figure S14.** The UV-Visible spectrum of compound 7

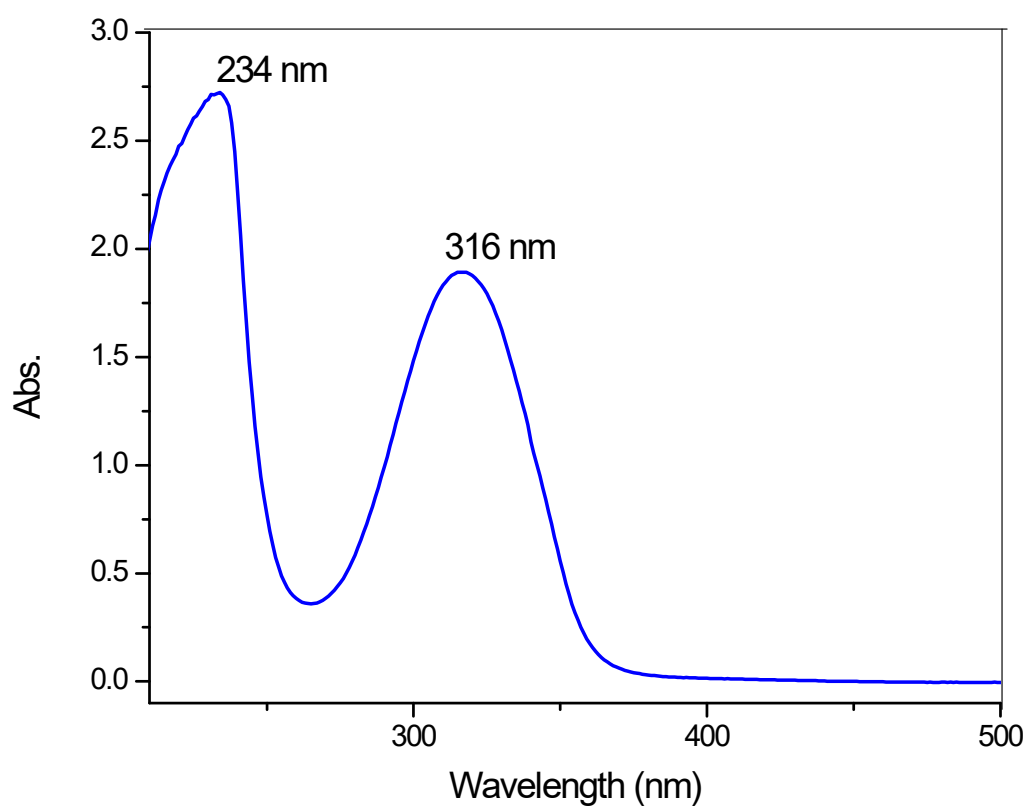

**Figure S15.** The UV-Visible spectrum of compound **9**

**Table S1.** The optimized bond parameters of the compounds **6**, **7**, and **9**

| <b>Compound 6</b>       |            |                         |            |
|-------------------------|------------|-------------------------|------------|
| <b>Bond Lengths (Å)</b> | <b>DFT</b> | <b>Bond Lengths (Å)</b> | <b>DFT</b> |
| R(1,2)                  | 1.3989     | R(16,17)                | 1.368      |
| R(1,6)                  | 1.4122     | R(16,19)                | 1.208      |
| R(1,29)                 | 1.0988     | R(17,18)                | 1.4665     |
| R(2,3)                  | 1.4191     | R(18,20)                | 1.513      |
| R(2,7)                  | 1.4495     | R(18,35)                | 1.1041     |
| R(3,4)                  | 1.3787     | R(18,36)                | 1.1057     |
| R(3,30)                 | 1.0939     | R(20,37)                | 1.0965     |
| R(4,5)                  | 1.4234     | R(20,38)                | 1.0984     |
| R(4,31)                 | 1.0914     | R(20,39)                | 1.1008     |
| R(5,6)                  | 1.4127     | R(21,40)                | 1.109      |
| R(5,22)                 | 1.3517     | R(21,41)                | 1.1026     |
| R(6,27)                 | 1.4233     | R(21,42)                | 1.1026     |
| R(7,8)                  | 1.322      | R(22,23)                | 1.4694     |
| R(7,11)                 | 1.7802     | R(23,24)                | 1.5403     |
| R(8,9)                  | 1.4142     | R(23,43)                | 1.1013     |
| R(9,10)                 | 1.3832     | R(23,44)                | 1.1024     |
| R(9,21)                 | 1.4752     | R(24,25)                | 1.5298     |
| R(10,11)                | 1.7306     | R(24,26)                | 1.5302     |
| R(10,12)                | 1.4613     | R(24,45)                | 1.1225     |
| R(12,13)                | 1.411      | R(25,46)                | 1.096      |
| R(12,14)                | 1.2227     | R(25,47)                | 1.0975     |
| R(13,15)                | 1.4723     | R(25,48)                | 1.0957     |
| R(13,32)                | 1.0212     | R(26,49)                | 1.0971     |
| R(14,40)                | 2.2555     | R(26,50)                | 1.096      |
| R(15,16)                | 1.5193     | R(26,51)                | 1.0967     |
| R(15,33)                | 1.1173     | R(27,28)                | 1.1578     |
| <b>Bond Angles (°)</b>  | <b>DFT</b> | <b>Bond Angles (°)</b>  | <b>DFT</b> |
| A(2,1,6)                | 121.2801   | A(16,17,18)             | 118.27     |
| A(2,1,29)               | 119.6232   | A(17,18,20)             | 109.745    |
| A(6,1,29)               | 119.0967   | A(17,18,35)             | 108.435    |
| A(1,2,3)                | 119.376    | A(17,18,36)             | 100.528    |
| A(1,2,7)                | 119.4228   | A(20,18,35)             | 112.843    |
| A(3,2,7)                | 121.1999   | A(20,18,36)             | 113.408    |
| A(2,3,4)                | 120.3819   | A(35,18,36)             | 111.084    |
| A(2,3,30)               | 120.2767   | A(18,20,37)             | 111.533    |
| A(4,3,30)               | 119.3392   | A(18,20,38)             | 111.586    |
| A(3,4,5)                | 120.2499   | A(18,20,39)             | 111.307    |



|                            |            |                            |            |
|----------------------------|------------|----------------------------|------------|
| A(3,4,31)                  | 121.6081   | A(37,20,38)                | 107.715    |
| A(5,4,31)                  | 118.1418   | A(37,20,39)                | 107.449    |
| A(4,5,6)                   | 120.1866   | A(38,20,39)                | 107.018    |
| A(4,5,22)                  | 110.9496   | A(9,21,40)                 | 111.597    |
| A(6,5,22)                  | 128.8636   | A(9,21,41)                 | 111.853    |
| A(1,6,5)                   | 118.5221   | A(9,21,42)                 | 111.398    |
| A(1,6,27)                  | 116.9743   | A(40,21,41)                | 107.68     |
| A(5,6,27)                  | 124.5035   | A(40,21,42)                | 107.566    |
| A(2,7,8)                   | 126.8695   | A(41,21,42)                | 106.483    |
| A(2,7,11)                  | 120.977    | A(5,22,23)                 | 121.668    |
| A(8,7,11)                  | 112.1391   | A(22,23,24)                | 102.255    |
| A(7,8,9)                   | 112.7726   | A(22,23,43)                | 108.787    |
| A(8,9,10)                  | 114.2201   | A(22,23,44)                | 108.03     |
| A(8,9,21)                  | 118.6231   | A(24,23,43)                | 113.156    |
| A(10,9,21)                 | 127.154    | A(24,23,44)                | 112.788    |
| A(9,10,11)                 | 110.3362   | A(43,23,44)                | 111.255    |
| A(9,10,12)                 | 126.7593   | A(23,24,25)                | 110.858    |
| A(11,10,12)                | 122.8791   | A(23,24,26)                | 109.222    |
| A(7,11,10)                 | 90.5088    | A(23,24,45)                | 107.609    |
| A(10,12,13)                | 115.6128   | A(25,24,26)                | 111.477    |
| A(10,12,14)                | 124.2235   | A(25,24,45)                | 108.473    |
| A(13,12,14)                | 120.0958   | A(26,24,45)                | 109.105    |
| A(12,13,15)                | 118.622    | A(24,25,46)                | 111.262    |
| A(12,13,32)                | 121.5628   | A(24,25,47)                | 111.005    |
| A(15,13,32)                | 114.9075   | A(24,25,48)                | 112.178    |
| A(13,15,16)                | 110.8592   | A(46,25,47)                | 107.393    |
| A(13,15,33)                | 109.6882   | A(46,25,48)                | 107.18     |
| A(13,15,34)                | 110.5299   | A(47,25,48)                | 107.589    |
| A(16,15,33)                | 109.3722   | A(24,26,49)                | 110.898    |
| A(16,15,34)                | 110.2719   | A(24,26,50)                | 112.005    |
| A(33,15,34)                | 105.9976   | A(24,26,51)                | 112.047    |
| A(15,16,17)                | 108.4074   | A(49,26,50)                | 107.101    |
| A(15,16,19)                | 128.1729   | A(49,26,51)                | 106.909    |
| A(17,16,19)                | 123.3899   | A(50,26,51)                | 107.601    |
| <b>Dihedral Angles (°)</b> | <b>DFT</b> | <b>Dihedral Angles (°)</b> | <b>DFT</b> |
| D(6,1,2,3)                 | -0.721     | D(12,13,15,16)             | 110.998    |
| D(6,1,2,7)                 | 179.6816   | D(12,13,15,33)             | -128.12    |
| D(29,1,2,3)                | 179.255    | D(12,13,15,34)             | -11.592    |
| D(29,1,2,7)                | -0.3424    | D(32,13,15,16)             | -44.626    |
| D(2,1,6,5)                 | 0.4569     | D(32,13,15,33)             | 76.2617    |
| D(2,1,6,27)                | -179.4307  | D(32,13,15,34)             | -167.22    |

|               |           |                |         |
|---------------|-----------|----------------|---------|
| D(29,1,6,5)   | -179.5193 | D(13,15,16,17) | -164.16 |
| D(29,1,6,27)  | 0.5932    | D(13,15,16,19) | 17.7974 |
| D(1,2,3,4)    | 0.5454    | D(33,15,16,17) | 74.7668 |
| D(1,2,3,30)   | -178.9073 | D(33,15,16,19) | -103.28 |
| D(7,2,3,4)    | -179.8646 | D(34,15,16,17) | -41.42  |
| D(7,2,3,30)   | 0.6827    | D(34,15,16,19) | 140.537 |
| D(1,2,7,8)    | 17.6557   | D(15,16,17,18) | 179.212 |
| D(1,2,7,11)   | -160.8518 | D(19,16,17,18) | -2.6297 |
| D(3,2,7,8)    | -161.9341 | D(16,17,18,20) | -76.575 |
| D(3,2,7,11)   | 19.5583   | D(16,17,18,35) | 47.0951 |
| D(2,3,4,5)    | -0.1153   | D(16,17,18,36) | 163.688 |
| D(2,3,4,31)   | -179.9574 | D(17,18,20,37) | -170.76 |
| D(30,3,4,5)   | 179.3425  | D(17,18,20,38) | -50.239 |
| D(30,3,4,31)  | -0.4996   | D(17,18,20,39) | 69.2435 |
| D(3,4,5,6)    | -0.1495   | D(35,18,20,37) | 68.1875 |
| D(3,4,5,22)   | 179.6878  | D(35,18,20,38) | -171.29 |
| D(31,4,5,6)   | 179.698   | D(35,18,20,39) | -51.806 |
| D(31,4,5,22)  | -0.4647   | D(36,18,20,37) | -59.237 |
| D(4,5,6,1)    | -0.0172   | D(36,18,20,38) | 61.287  |
| D(4,5,6,27)   | 179.8612  | D(36,18,20,39) | -179.23 |
| D(22,5,6,1)   | -179.8221 | D(5,22,23,24)  | -178.13 |
| D(22,5,6,27)  | 0.0563    | D(5,22,23,43)  | -58.204 |
| D(4,5,22,23)  | 178.4872  | D(5,22,23,44)  | 62.6878 |
| D(6,5,22,23)  | -1.6934   | D(22,23,24,25) | 80.9699 |
| D(2,7,8,9)    | -179.1676 | D(22,23,24,26) | -155.81 |
| D(11,7,8,9)   | -0.549    | D(22,23,24,45) | -37.499 |
| D(2,7,11,10)  | 179.8595  | D(43,23,24,25) | -35.86  |
| D(8,7,11,10)  | 1.1484    | D(43,23,24,26) | 87.3552 |
| D(7,8,9,10)   | -0.5678   | D(43,23,24,45) | -154.33 |
| D(7,8,9,21)   | -179.9987 | D(44,23,24,25) | -163.26 |
| D(8,9,10,11)  | 1.4242    | D(44,23,24,26) | -40.043 |
| D(8,9,10,12)  | 179.6216  | D(44,23,24,45) | 78.2734 |
| D(21,9,10,11) | -179.2026 | D(23,24,25,46) | -174.85 |
| D(21,9,10,12) | -1.0052   | D(23,24,25,47) | -55.316 |
| D(8,9,21,40)  | -166.2421 | D(23,24,25,48) | 65.0877 |
| D(8,9,21,41)  | -45.5336  | D(26,24,25,46) | 63.2413 |
| D(8,9,21,42)  | 73.5103   | D(26,24,25,47) | -177.22 |
| D(10,9,21,40) | 14.4091   | D(26,24,25,48) | -56.818 |
| D(10,9,21,41) | 135.1176  | D(45,24,25,46) | -56.909 |
| D(10,9,21,42) | -105.8386 | D(45,24,25,47) | 62.6282 |
| D(9,10,11,7)  | -1.4165   | D(45,24,25,48) | -176.97 |

|                         |            |                         |            |
|-------------------------|------------|-------------------------|------------|
| D(12,10,11,7)           | -179.6969  | D(23,24,26,49)          | -178.71    |
| D(9,10,12,13)           | 163.9633   | D(23,24,26,50)          | 61.6962    |
| D(9,10,12,14)           | -19.0402   | D(23,24,26,51)          | -59.337    |
| D(11,10,12,13)          | -18.0494   | D(25,24,26,49)          | -55.866    |
| D(11,10,12,14)          | 158.9471   | D(25,24,26,50)          | -175.46    |
| D(10,12,13,15)          | -175.6159  | D(25,24,26,51)          | 63.5096    |
| D(10,12,13,32)          | -21.6776   | D(45,24,26,49)          | 63.911     |
| D(14,12,13,15)          | 7.2543     | D(45,24,26,50)          | -55.68     |
| D(14,12,13,32)          | 161.1927   | D(45,24,26,51)          | -176.71    |
| <b>Compound 7</b>       |            |                         |            |
| <b>Bond Lengths (Å)</b> | <b>DFT</b> | <b>Bond Lengths (Å)</b> | <b>DFT</b> |
| R(1,2)                  | 1.3991     | R(15,31)                | 1.1182     |
| R(1,6)                  | 1.412      | R(15,32)                | 1.128      |
| R(1,27)                 | 1.0989     | R(16,17)                | 1.3724     |
| R(2,3)                  | 1.4191     | R(16,18)                | 1.2066     |
| R(2,7)                  | 1.4491     | R(17,33)                | 0.9961     |
| R(3,4)                  | 1.3786     | R(18,30)                | 2.684      |
| R(3,28)                 | 1.0938     | R(19,34)                | 1.1089     |
| R(4,5)                  | 1.4235     | R(19,35)                | 1.1028     |
| R(4,29)                 | 1.0914     | R(19,36)                | 1.1029     |
| R(5,6)                  | 1.4129     | R(20,21)                | 1.4696     |
| R(5,20)                 | 1.3514     | R(21,22)                | 1.5403     |
| R(6,25)                 | 1.4233     | R(21,37)                | 1.1013     |
| R(7,8)                  | 1.3221     | R(21,38)                | 1.1024     |
| R(7,11)                 | 1.7808     | R(22,23)                | 1.5298     |
| R(8,9)                  | 1.4138     | R(22,24)                | 1.5302     |
| R(9,10)                 | 1.3837     | R(22,39)                | 1.1225     |
| R(9,19)                 | 1.4749     | R(23,40)                | 1.096      |
| R(10,11)                | 1.7306     | R(23,41)                | 1.0975     |
| R(10,12)                | 1.4598     | R(23,42)                | 1.0957     |
| R(12,13)                | 1.413      | R(24,43)                | 1.0972     |
| R(12,14)                | 1.2221     | R(24,44)                | 1.096      |
| R(13,15)                | 1.4706     | R(24,45)                | 1.0967     |
| R(13,30)                | 1.0202     | R(25,26)                | 1.1578     |
| <b>Bond Angles (°)</b>  | <b>DFT</b> | <b>Bond Angles (°)</b>  | <b>DFT</b> |
| A(2,1,6)                | 121.2852   | A(16,15,31)             | 109.37     |
| A(2,1,27)               | 119.621    | A(16,15,32)             | 110.004    |
| A(6,1,27)               | 119.0938   | A(31,15,32)             | 105.894    |
| A(1,2,3)                | 119.3652   | A(15,16,17)             | 109.332    |
| A(1,2,7)                | 119.4058   | A(15,16,18)             | 129.916    |
| A(3,2,7)                | 121.2277   | A(17,16,18)             | 120.734    |

|                            |            |                            |            |
|----------------------------|------------|----------------------------|------------|
| A(2,3,4)                   | 120.3864   | A(16,17,33)                | 112.907    |
| A(2,3,28)                  | 120.2863   | A(9,19,34)                 | 111.663    |
| A(4,3,28)                  | 119.3251   | A(9,19,35)                 | 111.888    |
| A(3,4,5)                   | 120.2574   | A(9,19,36)                 | 111.385    |
| A(3,4,29)                  | 121.6111   | A(34,19,35)                | 107.688    |
| A(5,4,29)                  | 118.1313   | A(34,19,36)                | 107.51     |
| A(4,5,6)                   | 120.1733   | A(35,19,36)                | 106.435    |
| A(4,5,20)                  | 110.9591   | A(5,20,21)                 | 121.686    |
| A(6,5,20)                  | 128.8674   | A(20,21,22)                | 102.247    |
| A(1,6,5)                   | 118.5292   | A(20,21,37)                | 108.779    |
| A(1,6,25)                  | 116.98     | A(20,21,38)                | 108.024    |
| A(5,6,25)                  | 124.4907   | A(22,21,37)                | 113.161    |
| A(2,7,8)                   | 126.8873   | A(22,21,38)                | 112.794    |
| A(2,7,11)                  | 120.991    | A(37,21,38)                | 111.263    |
| A(8,7,11)                  | 112.1072   | A(21,22,23)                | 110.859    |
| A(7,8,9)                   | 112.8173   | A(21,22,24)                | 109.218    |
| A(8,9,10)                  | 114.2018   | A(21,22,39)                | 107.611    |
| A(8,9,19)                  | 118.6472   | A(23,22,24)                | 111.478    |
| A(10,9,19)                 | 127.1478   | A(23,22,39)                | 108.474    |
| A(9,10,11)                 | 110.3418   | A(24,22,39)                | 109.104    |
| A(9,10,12)                 | 126.7118   | A(22,23,40)                | 111.26     |
| A(11,10,12)                | 122.9211   | A(22,23,41)                | 111.017    |
| A(7,11,10)                 | 90.5094    | A(22,23,42)                | 112.18     |
| A(10,12,13)                | 115.6086   | A(40,23,41)                | 107.388    |
| A(10,12,14)                | 124.483    | A(40,23,42)                | 107.17     |
| A(13,12,14)                | 119.8475   | A(41,23,42)                | 107.591    |
| A(12,13,15)                | 118.576    | A(22,24,43)                | 110.897    |
| A(12,13,30)                | 121.6624   | A(22,24,44)                | 112.012    |
| A(15,13,30)                | 115.2316   | A(22,24,45)                | 112.051    |
| A(13,15,16)                | 111.1614   | A(43,24,44)                | 107.096    |
| A(13,15,31)                | 109.8676   | A(43,24,45)                | 106.901    |
| A(13,15,32)                | 110.4052   | A(44,24,45)                | 107.603    |
| <b>Dihedral Angles (°)</b> | <b>DFT</b> | <b>Dihedral Angles (°)</b> | <b>DFT</b> |
| D(6,1,2,3)                 | -0.7137    | D(11,10,12,13)             | -18.438    |
| D(6,1,2,7)                 | 179.6907   | D(11,10,12,14)             | 158.71     |
| D(27,1,2,3)                | 179.2683   | D(10,12,13,15)             | -175.88    |
| D(27,1,2,7)                | -0.3272    | D(10,12,13,30)             | -20.898    |
| D(2,1,6,5)                 | 0.4597     | D(14,12,13,15)             | 6.827      |
| D(2,1,6,25)                | -179.4253  | D(14,12,13,30)             | 161.812    |
| D(27,1,6,5)                | -179.5225  | D(12,13,15,16)             | 108.164    |
| D(27,1,6,25)               | 0.5926     | D(12,13,15,31)             | -130.64    |

|               |           |                |         |
|---------------|-----------|----------------|---------|
| D(1,2,3,4)    | 0.536     | D(12,13,15,32) | -14.205 |
| D(1,2,3,28)   | -178.9223 | D(30,13,15,16) | -48.391 |
| D(7,2,3,4)    | -179.876  | D(30,13,15,31) | 72.8097 |
| D(7,2,3,28)   | 0.6657    | D(30,13,15,32) | -170.76 |
| D(1,2,7,8)    | 17.124    | D(13,15,16,17) | -165.64 |
| D(1,2,7,11)   | -161.3823 | D(13,15,16,18) | 15.9677 |
| D(3,2,7,8)    | -162.4638 | D(31,15,16,17) | 72.8727 |
| D(3,2,7,11)   | 19.0299   | D(31,15,16,18) | -105.52 |
| D(2,3,4,5)    | -0.1139   | D(32,15,16,17) | -43.034 |
| D(2,3,4,29)   | -179.9507 | D(32,15,16,18) | 138.569 |
| D(28,3,4,5)   | 179.3495  | D(15,16,17,33) | -179.81 |
| D(28,3,4,29)  | -0.4873   | D(18,16,17,33) | -1.2429 |
| D(3,4,5,6)    | -0.1407   | D(5,20,21,22)  | -178.14 |
| D(3,4,5,20)   | 179.6978  | D(5,20,21,37)  | -58.216 |
| D(29,4,5,6)   | 179.7017  | D(5,20,21,38)  | 62.6776 |
| D(29,4,5,20)  | -0.4599   | D(20,21,22,23) | 81.0392 |
| D(4,5,6,1)    | -0.028    | D(20,21,22,24) | -155.75 |
| D(4,5,6,25)   | 179.8476  | D(20,21,22,39) | -37.433 |
| D(20,5,6,1)   | -179.8342 | D(37,21,22,23) | -35.779 |
| D(20,5,6,25)  | 0.0414    | D(37,21,22,24) | 87.4357 |
| D(4,5,20,21)  | 178.5013  | D(37,21,22,39) | -154.25 |
| D(6,5,20,21)  | -1.6781   | D(38,21,22,23) | -163.2  |
| D(2,7,8,9)    | -179.1697 | D(38,21,22,24) | -39.982 |
| D(11,7,8,9)   | -0.5518   | D(38,21,22,39) | 78.3311 |
| D(2,7,11,10)  | 179.8486  | D(21,22,23,40) | -174.91 |
| D(8,7,11,10)  | 1.138     | D(21,22,23,41) | -55.37  |
| D(7,8,9,10)   | -0.5481   | D(21,22,23,42) | 65.0455 |
| D(7,8,9,19)   | -179.9483 | D(24,22,23,40) | 63.1901 |
| D(8,9,10,11)  | 1.3974    | D(24,22,23,41) | -177.27 |
| D(8,9,10,12)  | 179.5973  | D(24,22,23,42) | -56.856 |
| D(19,9,10,11) | -179.2629 | D(39,22,23,40) | -56.96  |
| D(19,9,10,12) | -1.063    | D(39,22,23,41) | 62.5784 |
| D(8,9,19,34)  | -165.7721 | D(39,22,23,42) | -177.01 |
| D(8,9,19,35)  | -44.9814  | D(21,22,24,43) | -178.71 |
| D(8,9,19,36)  | 74.0153   | D(21,22,24,44) | 61.7036 |
| D(10,9,19,34) | 14.9142   | D(21,22,24,45) | -59.341 |
| D(10,9,19,35) | 135.7049  | D(23,22,24,43) | -55.862 |
| D(10,9,19,36) | -105.2984 | D(23,22,24,44) | -175.45 |
| D(9,10,11,7)  | -1.396    | D(23,22,24,45) | 63.5052 |
| D(12,10,11,7) | -179.6769 | D(39,22,24,43) | 63.9169 |
| D(9,10,12,13) | 163.5732  | D(39,22,24,44) | -55.672 |

|                         |            |                         |            |
|-------------------------|------------|-------------------------|------------|
| D(9,10,12,14)           | -19.279    | D(39,22,24,45)          | -176.72    |
| <b>Compound 9</b>       |            |                         |            |
| <b>Bond Lengths (Å)</b> | <b>DFT</b> | <b>Bond Lengths (Å)</b> | <b>DFT</b> |
| R(1,2)                  | 1.3948     | R(17,37)                | 1.012      |
| R(1,6)                  | 1.3948     | R(19,38)                | 1.113      |
| R(1,31)                 | 1.1        | R(19,39)                | 1.113      |
| R(2,3)                  | 1.3949     | R(19,40)                | 1.113      |
| R(2,7)                  | 1.337      | R(20,21)                | 1.402      |
| R(3,4)                  | 1.3948     | R(21,22)                | 1.523      |
| R(3,32)                 | 1.1        | R(21,41)                | 1.113      |
| R(4,5)                  | 1.3948     | R(21,42)                | 1.113      |
| R(4,33)                 | 1.1        | R(22,23)                | 1.523      |
| R(5,6)                  | 1.3949     | R(22,24)                | 1.523      |
| R(5,20)                 | 1.355      | R(22,43)                | 1.113      |
| R(6,29)                 | 1.313      | R(23,44)                | 1.113      |
| R(7,8)                  | 1.3152     | R(23,45)                | 1.113      |
| R(7,11)                 | 1.7161     | R(23,46)                | 1.113      |
| R(8,9)                  | 1.3813     | R(24,47)                | 1.113      |
| R(9,10)                 | 1.3788     | R(24,48)                | 1.113      |
| R(9,19)                 | 1.497      | R(24,49)                | 1.113      |
| R(10,11)                | 1.7154     | R(25,26)                | 1.523      |
| R(10,12)                | 1.351      | R(25,50)                | 1.113      |
| R(12,13)                | 1.369      | R(25,51)                | 1.113      |
| R(12,14)                | 1.208      | R(26,27)                | 1.523      |
| R(13,15)                | 1.45       | R(26,52)                | 1.113      |
| R(13,34)                | 1.012      | R(26,53)                | 1.113      |
| R(14,38)                | 1.7564     | R(27,28)                | 1.523      |
| R(15,16)                | 1.509      | R(27,54)                | 1.113      |
| R(15,35)                | 1.113      | R(27,55)                | 1.113      |
| R(15,36)                | 1.113      | R(28,56)                | 1.113      |
| R(16,17)                | 1.369      | R(28,57)                | 1.113      |
| R(16,18)                | 1.208      | R(28,58)                | 1.113      |
| R(17,25)                | 1.45       | R(29,30)                | 1.158      |
| <b>Bond Angles (°)</b>  | <b>DFT</b> | <b>Bond Angles (°)</b>  | <b>DFT</b> |
| A(2,1,6)                | 120.0029   | A(38,19,40)             | 109.462    |
| A(2,1,31)               | 119.9986   | A(39,19,40)             | 109.52     |
| A(6,1,31)               | 119.9985   | A(5,20,21)              | 110.8      |
| A(1,2,3)                | 119.9969   | A(20,21,22)             | 109.5      |
| A(1,2,7)                | 120.0015   | A(20,21,41)             | 109.442    |
| A(3,2,7)                | 120.0016   | A(20,21,42)             | 109.462    |
| A(2,3,4)                | 120.0002   | A(22,21,41)             | 109.442    |

|             |          |             |         |
|-------------|----------|-------------|---------|
| A(2,3,32)   | 119.9999 | A(22,21,42) | 109.462 |
| A(4,3,32)   | 119.9999 | A(41,21,42) | 109.52  |
| A(3,4,5)    | 120.0033 | A(21,22,23) | 109.5   |
| A(3,4,33)   | 119.9984 | A(21,22,24) | 109.442 |
| A(5,4,33)   | 119.9983 | A(21,22,43) | 109.462 |
| A(4,5,6)    | 119.9972 | A(23,22,24) | 109.442 |
| A(4,5,20)   | 120.0014 | A(23,22,43) | 109.462 |
| A(6,5,20)   | 120.0014 | A(24,22,43) | 109.52  |
| A(1,6,5)    | 119.9996 | A(22,23,44) | 109.5   |
| A(1,6,29)   | 120.0002 | A(22,23,45) | 109.442 |
| A(5,6,29)   | 120.0002 | A(22,23,46) | 109.462 |
| A(2,7,8)    | 121.8997 | A(44,23,45) | 109.442 |
| A(2,7,11)   | 121.8996 | A(44,23,46) | 109.462 |
| A(8,7,11)   | 116.2007 | A(45,23,46) | 109.52  |
| A(7,8,9)    | 109.1722 | A(22,24,47) | 109.5   |
| A(8,9,10)   | 115.6691 | A(22,24,48) | 109.442 |
| A(8,9,19)   | 122.1655 | A(22,24,49) | 109.462 |
| A(10,9,19)  | 122.1654 | A(47,24,48) | 109.442 |
| A(9,10,11)  | 109.7076 | A(47,24,49) | 109.462 |
| A(9,10,12)  | 125.1462 | A(48,24,49) | 109.52  |
| A(11,10,12) | 125.1462 | A(17,25,26) | 109.5   |
| A(7,11,10)  | 89.2503  | A(17,25,50) | 109.442 |
| A(10,12,13) | 120      | A(17,25,51) | 109.462 |
| A(10,12,14) | 120      | A(26,25,50) | 109.442 |
| A(13,12,14) | 120      | A(26,25,51) | 109.462 |
| A(12,13,15) | 120      | A(50,25,51) | 109.52  |
| A(12,13,34) | 120      | A(25,26,27) | 109.5   |
| A(15,13,34) | 120      | A(25,26,52) | 109.442 |
| A(13,15,16) | 109.5    | A(25,26,53) | 109.462 |
| A(13,15,35) | 109.4419 | A(27,26,52) | 109.442 |
| A(13,15,36) | 109.4618 | A(27,26,53) | 109.462 |
| A(16,15,35) | 109.4418 | A(52,26,53) | 109.52  |
| A(16,15,36) | 109.4618 | A(26,27,28) | 109.5   |
| A(35,15,36) | 109.52   | A(26,27,54) | 109.442 |
| A(15,16,17) | 120      | A(26,27,55) | 109.462 |
| A(15,16,18) | 120      | A(28,27,54) | 109.442 |
| A(17,16,18) | 120      | A(28,27,55) | 109.462 |
| A(16,17,25) | 120      | A(54,27,55) | 109.52  |
| A(16,17,37) | 120      | A(27,28,56) | 109.5   |
| A(25,17,37) | 120      | A(27,28,57) | 109.442 |
| A(9,19,38)  | 109.5    | A(27,28,58) | 109.462 |

|                            |            |                            |            |
|----------------------------|------------|----------------------------|------------|
| A(9,19,39)                 | 109.4418   | A(56,28,57)                | 109.442    |
| A(9,19,40)                 | 109.4618   | A(56,28,58)                | 109.462    |
| A(38,19,39)                | 109.4418   | A(57,28,58)                | 109.52     |
| <b>Dihedral Angles (°)</b> | <b>DFT</b> | <b>Dihedral Angles (°)</b> | <b>DFT</b> |
| D(6,1,2,3)                 | 0.0058     | D(15,16,17,25)             | 180        |
| D(6,1,2,7)                 | -179.9942  | D(15,16,17,37)             | 0          |
| D(31,1,2,3)                | -179.9942  | D(18,16,17,25)             | 0          |
| D(31,1,2,7)                | 0.0058     | D(18,16,17,37)             | 180        |
| D(2,1,6,5)                 | -0.0012    | D(16,17,25,26)             | 180        |
| D(2,1,6,29)                | 179.9988   | D(16,17,25,50)             | -60.036    |
| D(31,1,6,5)                | 179.9988   | D(16,17,25,51)             | 59.9996    |
| D(31,1,6,29)               | -0.0012    | D(37,17,25,26)             | 0          |
| D(1,2,3,4)                 | -0.0058    | D(37,17,25,50)             | 119.964    |
| D(1,2,3,32)                | 179.9942   | D(37,17,25,51)             | -120       |
| D(7,2,3,4)                 | 179.9942   | D(5,20,21,22)              | 180        |
| D(7,2,3,32)                | -0.0058    | D(5,20,21,41)              | -60.036    |
| D(1,2,7,8)                 | 22.2468    | D(5,20,21,42)              | 59.9996    |
| D(1,2,7,11)                | -157.7532  | D(20,21,22,23)             | 60         |
| D(3,2,7,8)                 | -157.7532  | D(20,21,22,24)             | 179.964    |
| D(3,2,7,11)                | 22.2468    | D(20,21,22,43)             | -60        |
| D(2,3,4,5)                 | 0.0012     | D(41,21,22,23)             | -59.964    |
| D(2,3,4,33)                | -179.9988  | D(41,21,22,24)             | 60         |
| D(32,3,4,5)                | -179.9988  | D(41,21,22,43)             | -179.96    |
| D(32,3,4,33)               | 0.0012     | D(42,21,22,23)             | -180       |
| D(3,4,5,6)                 | 0.0034     | D(42,21,22,24)             | -60.036    |
| D(3,4,5,20)                | -179.9966  | D(42,21,22,43)             | 60         |
| D(33,4,5,6)                | -179.9966  | D(21,22,23,44)             | -180       |
| D(33,4,5,20)               | 0.0034     | D(21,22,23,45)             | -60.036    |
| D(4,5,6,1)                 | -0.0034    | D(21,22,23,46)             | 59.9996    |
| D(4,5,6,29)                | 179.9966   | D(24,22,23,44)             | 60.0364    |
| D(20,5,6,1)                | 179.9966   | D(24,22,23,45)             | -180       |
| D(20,5,6,29)               | -0.0034    | D(24,22,23,46)             | -59.964    |
| D(4,5,20,21)               | 180        | D(43,22,23,44)             | -60        |
| D(6,5,20,21)               | 0          | D(43,22,23,45)             | 59.964     |
| D(2,7,8,9)                 | 179.9979   | D(43,22,23,46)             | 180        |
| D(11,7,8,9)                | -0.0021    | D(21,22,24,47)             | -180       |
| D(2,7,11,10)               | -179.9975  | D(21,22,24,48)             | 60.0363    |
| D(8,7,11,10)               | 0.0025     | D(21,22,24,49)             | -60        |
| D(7,8,9,10)                | 0.0003     | D(23,22,24,47)             | -60.001    |
| D(7,8,9,19)                | -179.9997  | D(23,22,24,48)             | -179.96    |
| D(8,9,10,11)               | 0.0015     | D(23,22,24,49)             | 59.9997    |



|                |           |                |         |
|----------------|-----------|----------------|---------|
| D(8,9,10,12)   | -179.9985 | D(43,22,24,47) | 59.9997 |
| D(19,9,10,11)  | -179.9985 | D(43,22,24,48) | -59.964 |
| D(19,9,10,12)  | 0.0015    | D(43,22,24,49) | -180    |
| D(8,9,19,38)   | 180       | D(17,25,26,27) | -180    |
| D(8,9,19,39)   | -60.0364  | D(17,25,26,52) | -60.036 |
| D(8,9,19,40)   | 59.9995   | D(17,25,26,53) | 59.9996 |
| D(10,9,19,38)  | 0         | D(50,25,26,27) | 60.0364 |
| D(10,9,19,39)  | 119.9636  | D(50,25,26,52) | -180    |
| D(10,9,19,40)  | -120.0005 | D(50,25,26,53) | -59.964 |
| D(9,10,11,7)   | -0.0021   | D(51,25,26,27) | -60     |
| D(12,10,11,7)  | 179.9979  | D(51,25,26,52) | 59.9641 |
| D(9,10,12,13)  | 180       | D(51,25,26,53) | -180    |
| D(9,10,12,14)  | 0         | D(25,26,27,28) | 180     |
| D(11,10,12,13) | 0         | D(25,26,27,54) | -60.036 |
| D(11,10,12,14) | -180      | D(25,26,27,55) | 59.9996 |
| D(10,12,13,15) | 180       | D(52,26,27,28) | 60.0363 |
| D(10,12,13,34) | 0         | D(52,26,27,54) | 180     |
| D(14,12,13,15) | 0         | D(52,26,27,55) | -59.964 |
| D(14,12,13,34) | 180       | D(53,26,27,28) | -60     |
| D(12,13,15,16) | -180      | D(53,26,27,54) | 59.964  |
| D(12,13,15,35) | -60.0363  | D(53,26,27,55) | -180    |
| D(12,13,15,36) | 59.9997   | D(26,27,28,56) | 180     |
| D(34,13,15,16) | 0         | D(26,27,28,57) | -60.036 |
| D(34,13,15,35) | 119.9636  | D(26,27,28,58) | 59.9996 |
| D(34,13,15,36) | -120.0004 | D(54,27,28,56) | 60.0364 |
| D(13,15,16,17) | -180      | D(54,27,28,57) | -180    |
| D(13,15,16,18) | 0         | D(54,27,28,58) | -59.964 |
| D(35,15,16,17) | 60.0363   | D(55,27,28,56) | -60     |
| D(35,15,16,18) | -119.9637 | D(55,27,28,57) | 59.964  |
| D(36,15,16,17) | -59.9996  | D(55,27,28,58) | 180     |

**Table S2.** The NBO analysis of compound **6**

| Type              | Donor NBO (i)  | ED/e    | Acceptor NBO (j) | ED/e    | E <sup>(2)</sup><br>KJ/mol | E(j)-E(i)<br>a.u. | F(i, j)<br>a.u. |
|-------------------|----------------|---------|------------------|---------|----------------------------|-------------------|-----------------|
| $\pi$ - $\pi^*$   | BD (2) C1-C2   | 1.62294 | BD*(2) C3-C4     | 0.2877  | 207.02                     | 0.47              | 0.14            |
|                   |                |         | BD*(2) C7-N8     | 0.33342 | 187.36                     | 0.44              | 0.127           |
| $\pi$ - $\pi^*$   | BD (2) C3-C4   | 1.68641 | BD*(2) C1-C2     | 0.34202 | 122.97                     | 0.49              | 0.107           |
|                   |                |         | BD*(2) C5-C6     | 0.42484 | 221.46                     | 0.46              | 0.144           |
| $\pi$ - $\pi^*$   | BD (2) C5-C6   | 1.62324 | BD*(2) C1-C2     | 0.34202 | 221.04                     | 0.5               | 0.146           |
| $\pi$ - $\pi^*$   | BD (2) C7-N8   | 1.83112 | BD*(2) C1-C2     | 0.34202 | 54.56                      | 0.58              | 0.081           |
|                   |                |         | BD*(2) C9-C10    | 0.28805 | 187.28                     | 0.58              | 0.149           |
| $\pi$ - $\pi^*$   | BD (2) C9-C10  | 1.82358 | BD*(2) C7-N8     | 0.33342 | 62.47                      | 0.49              | 0.08            |
|                   |                |         | BD*(2) C12-O14   | 0.30172 | 210.2                      | 0.55              | 0.153           |
| $\pi$ - $\pi^*$   | BD (2) C12-O14 | 1.9824  | BD*(2) C9-C10    | 0.28805 | 28.41                      | 0.65              | 0.064           |
|                   |                |         | BD*(2) C12-O14   | 0.30172 | 5.06                       | 0.67              | 0.027           |
| $n$ - $\sigma^*$  | LP (1) N8      | 1.92982 | BD*(1) C9-C10    | 0.03463 | 26.32                      | 1.38              | 0.084           |
| $n$ - $\sigma^*$  | LP (1) S11     | 1.98407 | BD*(1) C7-N8     | 0.02181 | 15.27                      | 1.59              | 0.068           |
| $n$ - $\pi^*$     | LP (2) S11     | 1.70801 | BD*(2) C7-N8     | 0.33342 | 229.62                     | 0.46              | 0.144           |
|                   |                |         | BD*(2) C9-C10    | 0.28805 | 119.29                     | 0.5               | 0.107           |
| $n$ - $\pi^*$     | LP (1) N13     | 1.79183 | BD*(2) C12-O14   | 0.30172 | 386.77                     | 0.54              | 0.205           |
| $n$ - $\sigma^*$  | LP (2) O14     | 1.88955 | BD*(1) C10-C12   | 0.04502 | 73.68                      | 1.33              | 0.139           |
|                   |                |         | BD*(1) C12-N13   | 0.06109 | 153.22                     | 1.12              | 0.183           |
| $n$ - $\pi^*$     | LP (2) O17     | 1.83346 | BD*(2) C16-O19   | 0.17567 | 317.52                     | 0.64              | 0.197           |
| $n$ - $\sigma^*$  | LP (2) O19     | 1.88379 | BD*(1) C15-C16   | 0.04313 | 92.55                      | 1.06              | 0.139           |
|                   |                |         | BD*(1) C16-O17   | 0.07354 | 186.36                     | 1.02              | 0.193           |
| $n$ - $\pi^*$     | LP (2) O22     | 1.85984 | BD*(2) C5-C6     | 0.42484 | 209.2                      | 0.61              | 0.168           |
| $n$ - $\sigma^*$  | LP (1) N28     | 1.96918 | BD*(1) C6-C27    | 0.03493 | 46.36                      | 1.71              | 0.123           |
| $\pi^*$ - $\pi^*$ | BD*(2) C5-C6   | 0.42484 | BD*(2) C1-C2     | 0.34202 | 1282.02                    | 0.02              | 0.123           |
|                   |                |         | BD*(2) C3-C4     | 0.2877  | 1326.5                     | 0.02              | 0.124           |
| $\pi^*$ - $\pi^*$ | BD*(2) C7-N8   | 0.33342 | BD*(2) C1-C2     | 0.34202 | 588.31                     | 0.03              | 0.106           |
|                   |                |         | BD*(2) C9-C10    | 0.28805 | 454.05                     | 0.04              | 0.106           |
| $\pi^*$ - $\pi^*$ | BD*(2) C9-C10  | 0.28805 | BD*(2) C12-O14   | 0.30172 | 1311.68                    | 0.02              | 0.117           |

**Table S3.** The NBO analysis of compound 7

| Type              | Donor NBO (i)  | ED/e    | Acceptor NBO (j) | ED/e    | E <sup>(2)</sup><br>KJ/mol | E(j)-E(i)<br>a.u. | F(i, j)<br>a.u. |
|-------------------|----------------|---------|------------------|---------|----------------------------|-------------------|-----------------|
| $\pi$ - $\pi^*$   | BD (2) C1-C2   | 1.69982 | BD*(2) C3-C4     | 0.30514 | 217.86                     | 0.5               | 0.146           |
|                   |                |         | BD*(2) C7-N8     | 0.30426 | 162.09                     | 0.49              | 0.126           |
| $\pi$ - $\pi^*$   | BD (2) C3-C4   | 1.68251 | BD*(2) C1-C2     | 0.35391 | 141.5                      | 0.51              | 0.118           |
|                   |                |         | BD*(2) C5-C6     | 0.43913 | 224.85                     | 0.47              | 0.147           |
| $\pi$ - $\pi^*$   | BD (2) C5-C6   | 1.62456 | BD*(2) C1-C2     | 0.35391 | 226.48                     | 0.52              | 0.15            |
| $\pi$ - $\pi^*$   | BD (2) C7-N8   | 1.83757 | BD*(2) C1-C2     | 0.35391 | 74.31                      | 0.58              | 0.095           |
|                   |                |         | BD*(2) C9-C10    | 0.27945 | 168.57                     | 0.6               | 0.143           |
| $\pi$ - $\pi^*$   | BD (2) C9-C10  | 1.82707 | BD*(2) C7-N8     | 0.30426 | 93.55                      | 0.53              | 0.101           |
|                   |                |         | BD*(2) C12-O14   | 0.24884 | 176.69                     | 0.58              | 0.142           |
| $\pi$ - $\pi^*$   | BD (2) C12-O14 | 1.96998 | BD*(2) C9-C10    | 0.27945 | 53.6                       | 0.67              | 0.088           |
|                   |                |         | BD*(2) C12-O14   | 0.24884 | 5.65                       | 0.69              | 0.029           |
| n - $\pi^*$       | LP (2) S11     | 1.73404 | BD*(2) C7-N8     | 0.30426 | 188.2                      | 0.5               | 0.135           |
|                   |                |         | BD*(2) C9-C10    | 0.27945 | 129.7                      | 0.52              | 0.114           |
| n - $\pi^*$       | LP (1) N13     | 1.82773 | BD*(2) C12-O14   | 0.24884 | 320.45                     | 0.59              | 0.193           |
| n - $\sigma^*$    | LP (2) O14     | 1.88753 | BD*(1) C10-C12   | 0.04325 | 99.16                      | 1.22              | 0.154           |
|                   |                |         | BD*(1) C12-N13   | 0.07026 | 168.57                     | 1.08              | 0.189           |
| n - $\pi^*$       | LP (2) O17     | 1.86814 | BD*(2) C16-O18   | 0.155   | 289.49                     | 0.66              | 0.192           |
| n - $\sigma^*$    | LP (2) O18     | 1.89042 | BD*(1) C15-C16   | 0.05939 | 123.64                     | 1                 | 0.155           |
|                   |                |         | BD*(1) C16-O17   | 0.07518 | 189.79                     | 1.04              | 0.195           |
| n - $\pi^*$       | LP (2) O20     | 1.8519  | BD*(2) C5-C6     | 0.43913 | 223.59                     | 0.58              | 0.17            |
| $\pi^*$ - $\pi^*$ | BD*(2) C5-C6   | 0.43913 | BD*(2) C1-C2     | 0.35391 | 908.18                     | 0.03              | 0.122           |
|                   |                |         | BD*(2) C3-C4     | 0.30514 | 783.41                     | 0.04              | 0.123           |
| $\pi^*$ - $\pi^*$ | BD*(2) C7-N8   | 0.30426 | BD*(2) C9-C10    | 0.27945 | 833.66                     | 0.02              | 0.107           |
| $\pi^*$ - $\pi^*$ | BD*(2) C9-C10  | 0.27945 | BD*(2) C12-O14   | 0.24884 | 742.91                     | 0.03              | 0.116           |

**Table S4.** The NBO analysis of compound **9**

| Type              | Donor NBO (i) | ED/e    | Acceptor NBO (j) | ED/e    | E <sup>(2)</sup><br>KJ/mol | E(j)-E(i)<br>a.u. | F(i, j)<br>a.u. |
|-------------------|---------------|---------|------------------|---------|----------------------------|-------------------|-----------------|
| $\pi$ - $\pi^*$   | BD (2) C1-C2  | 1.62306 | BD*(2) C3-C4     | 0.28792 | 207.02                     | 0.47              | 0.14            |
|                   |               |         | BD*(2) C7-N8     | 0.33411 | 186.23                     | 0.44              | 0.126           |
| $\pi$ - $\pi^*$   | BD (2) C3-C4  | 1.68594 | BD*(2) C1-C2     | 0.34156 | 123.18                     | 0.49              | 0.107           |
|                   |               |         | BD*(2) C5-C6     | 0.42548 | 221.79                     | 0.46              | 0.144           |
| $\pi$ - $\pi^*$   | BD (2) C5-C6  | 1.62396 | BD*(2) C1-C2     | 0.34156 | 220.16                     | 0.5               | 0.146           |
|                   |               |         | BD*(2) C3-C4     | 0.28792 | 103.05                     | 0.49              | 0.101           |
| $\pi$ - $\pi^*$   | BD (2) C9-C10 | 1.82409 | BD*(2) C7-N8     | 0.33411 | 63.14                      | 0.49              | 0.08            |
|                   |               |         | BD*(2) C12-O14   | 0.30403 | 208.07                     | 0.55              | 0.152           |
| n - $\sigma^*$    | LP (1) N8     | 1.93004 | BD*(1) C7-S11    | 0.05137 | 80.17                      | 0.93              | 0.12            |
|                   |               |         | BD*(1) C9-C10    | 0.03463 | 26.28                      | 1.38              | 0.084           |
| n - $\pi^*$       | LP (2) S11    | 1.70624 | BD*(2) C7-N8     | 0.33411 | 230.58                     | 0.46              | 0.144           |
|                   |               |         | BD*(2) C9-C10    | 0.28786 | 120.12                     | 0.5               | 0.107           |
| n - $\pi^*$       | LP (1) N13    | 1.78708 | BD*(2) C12-O14   | 0.30403 | 394.72                     | 0.54              | 0.206           |
| n - $\sigma^*$    | LP (2) O14    | 1.88994 | BD*(1) C10-C12   | 0.04507 | 73.72                      | 1.33              | 0.139           |
|                   |               |         | BD*(1) C12-N13   | 0.06057 | 152.09                     | 1.13              | 0.183           |
| n - $\pi^*$       | LP (1) N17    | 1.78446 | BD*(2) C16-O18   | 0.2221  | 405.56                     | 0.55              | 0.206           |
| n - $\sigma^*$    | LP (2) O18    | 1.89048 | BD*(1) C15-C16   | 0.0463  | 107.07                     | 1.04              | 0.148           |
|                   |               |         | BD*(1) C16-N17   | 0.0574  | 149.83                     | 1.11              | 0.181           |
| n - $\pi^*$       | LP (2) O20    | 1.86022 | BD*(2) C5-C6     | 0.42548 | 208.7                      | 0.61              | 0.168           |
| $\pi^*$ - $\pi^*$ | BD*(2) C5-C6  | 0.42548 | BD*(2) C1-C2     | 0.34156 | 1255.83                    | 0.02              | 0.123           |
|                   |               |         | BD*(2) C3-C4     | 0.28792 | 1305.45                    | 0.02              | 0.124           |
| $\pi^*$ - $\pi^*$ | BD*(2) C7-N8  | 0.33411 | BD*(2) C1-C2     | 0.34156 | 597.89                     | 0.03              | 0.106           |
|                   |               |         | BD*(2) C9-C10    | 0.28786 | 450.49                     | 0.04              | 0.106           |
| $\pi^*$ - $\pi^*$ | BD*(2) C9-C10 | 0.28786 | BD*(2) C12- O14  | 0.30403 | 1253.69                    | 0.02              | 0.117           |

**Table S5.** The Mulliken atomic charges of **6**, **7**, and **9**

| <b>6</b>     |                | <b>7</b>     |                | <b>9</b>     |                |
|--------------|----------------|--------------|----------------|--------------|----------------|
| <b>Atoms</b> | <b>Charges</b> | <b>Atoms</b> | <b>Charges</b> | <b>Atoms</b> | <b>Charges</b> |
| 1C           | 0.07456        | 1C           | 0.07627        | 1C           | 0.01854        |
| 2C           | -0.1922        | 2C           | -0.195         | 2C           | -0.1063        |
| 3C           | 0.03105        | 3C           | 0.03198        | 3C           | -0.0463        |
| 4C           | -0.3398        | 4C           | -0.3402        | 4C           | -0.178         |
| 5C           | 0.41769        | 5C           | 0.41874        | 5C           | 0.15844        |
| 6C           | -0.2764        | 6C           | -0.2766        | 6C           | -0.1432        |
| 7C           | 0.201          | 7C           | 0.20491        | 7C           | -0.1687        |
| 8N           | -0.3915        | 8N           | -0.3923        | 8N           | -0.1291        |
| 9C           | 0.37644        | 9C           | 0.38117        | 9C           | 0.03835        |
| 10C          | -0.4886        | 10C          | -0.493         | 10C          | -0.459         |
| 11S          | 0.07982        | 11S          | 0.07859        | 11S          | 0.45261        |
| 12C          | 0.6742         | 12C          | 0.67734        | 12C          | 0.40262        |
| 13N          | -0.4837        | 13N          | -0.4879        | 13N          | -0.3994        |
| 14O          | -0.5489        | 14O          | -0.5452        | 14O          | -0.373         |
| 15C          | -0.2232        | 15C          | -0.2134        | 15C          | -0.0301        |
| 16C          | 0.6022         | 16C          | 0.60285        | 16C          | 0.29587        |
| 17O          | -0.4607        | 17O          | -0.5241        | 17N          | -0.401         |
| 18C          | 0.05562        | 18O          | -0.499         | 18O          | -0.3682        |
| 19O          | -0.5145        | 19C          | -0.5223        | 19C          | -0.199         |
| 20C          | -0.5261        | 20O          | -0.3739        | 20O          | -0.171         |
| 21C          | -0.5211        | 21C          | -0.0521        | 21C          | -0.0728        |
| 22O          | -0.3746        | 22C          | -0.0029        | 22C          | -0.1111        |
| 23C          | -0.052         | 23C          | -0.4949        | 23C          | -0.2117        |
| 24C          | -0.0029        | 24C          | -0.5004        | 24C          | -0.2084        |
| 25C          | -0.4949        | 25C          | 0.11275        | 25C          | -0.0092        |
| 26C          | -0.5004        | 26N          | -0.221         | 26C          | -0.1815        |
| 27C          | 0.11341        | 27H          | 0.17791        | 27C          | -0.1607        |
| 28N          | -0.2222        | 28H          | 0.15731        | 28C          | -0.2134        |
| 29H          | 0.17778        | 29H          | 0.19515        | 29C          | -0.061         |
| 30H          | 0.15767        | 30H          | 0.28724        | 30N          | -0.0688        |
| 31H          | 0.19491        | 31H          | 0.1879         | 31H          | 0.17359        |
| 32H          | 0.28798        | 32H          | 0.22392        | 32H          | 0.14924        |
| 33H          | 0.18492        | 33H          | 0.3447         | 33H          | 0.15984        |
| 34H          | 0.22002        | 34H          | 0.21143        | 34H          | 0.25297        |
| 35H          | 0.13257        | 35H          | 0.19394        | 35H          | 0.11134        |
| 36H          | 0.1391         | 36H          | 0.19233        | 36H          | 0.11121        |
| 37H          | 0.16614        | 37H          | 0.14459        | 37H          | 0.23206        |
| 38H          | 0.17352        | 38H          | 0.14163        | 38H          | 0.15766        |

---

|     |         |     |         |     |         |
|-----|---------|-----|---------|-----|---------|
| 39H | 0.1805  | 39H | 0.13935 | 39H | 0.09787 |
| 40H | 0.21144 | 40H | 0.15666 | 40H | 0.09868 |
| 41H | 0.19306 | 41H | 0.16096 | 41H | 0.10904 |
| 42H | 0.19106 | 42H | 0.15578 | 42H | 0.1067  |
| 43H | 0.14444 | 43H | 0.16233 | 43H | 0.10002 |
| 44H | 0.14152 | 44H | 0.15617 | 44H | 0.07689 |
| 45H | 0.13931 | 45H | 0.16038 | 45H | 0.08522 |
| 46H | 0.15648 |     |         | 46H | 0.07613 |
| 47H | 0.16103 |     |         | 47H | 0.08044 |
| 48H | 0.15566 |     |         | 48H | 0.08213 |
| 49H | 0.16217 |     |         | 49H | 0.08422 |
| 50H | 0.15612 |     |         | 50H | 0.09373 |
| 51H | 0.16029 |     |         | 51H | 0.09398 |
|     |         |     |         | 52H | 0.08649 |
|     |         |     |         | 53H | 0.08647 |
|     |         |     |         | 54H | 0.08559 |
|     |         |     |         | 55H | 0.08574 |
|     |         |     |         | 56H | 0.07782 |
|     |         |     |         | 57H | 0.07463 |
|     |         |     |         | 58H | 0.07464 |

---

**Table S6.** Anti-inflammatory activity data of the synthesized compounds

| <b>Concentrations of the samples (<math>\mu\text{g/ml}</math>)</b> | <b>6</b> | <b>7</b> | <b>9</b> | <b>Std</b> |
|--------------------------------------------------------------------|----------|----------|----------|------------|
| 20                                                                 | 26.30923 | 28.92768 | 32.29426 | 22.31920   |
| 40                                                                 | 33.41646 | 36.40898 | 40.02494 | 30.04988   |
| 80                                                                 | 46.75810 | 49.50125 | 52.36908 | 43.39152   |
| 200                                                                | 59.47631 | 62.34414 | 64.46384 | 56.85786   |
| 400                                                                | 78.92768 | 81.17207 | 84.41397 | 75.56110   |

**Table S7.** Anti-diabetic data of the synthesized compounds

| <b>Concentrations of the samples (<math>\mu\text{g/ml}</math>)</b> | <b>6</b> | <b>7</b> | <b>9</b> | <b>Std</b> |
|--------------------------------------------------------------------|----------|----------|----------|------------|
| 20                                                                 | 29.47462 | 31.25557 | 23.41941 | 26.35797   |
| 40                                                                 | 45.41407 | 47.72930 | 40.96171 | 42.56456   |
| 80                                                                 | 58.59305 | 59.21638 | 54.31879 | 56.72306   |
| 200                                                                | 81.21104 | 82.27961 | 75.60107 | 80.05343   |
| 400                                                                | 88.42386 | 89.84862 | 83.43722 | 86.82102   |
